# Supplementary material
Source: Springer Nature journal article supplement (https://springermedizin.de/resource/supplementary/13054_2011_960_MOESM3_ESM.pdf/9708804)

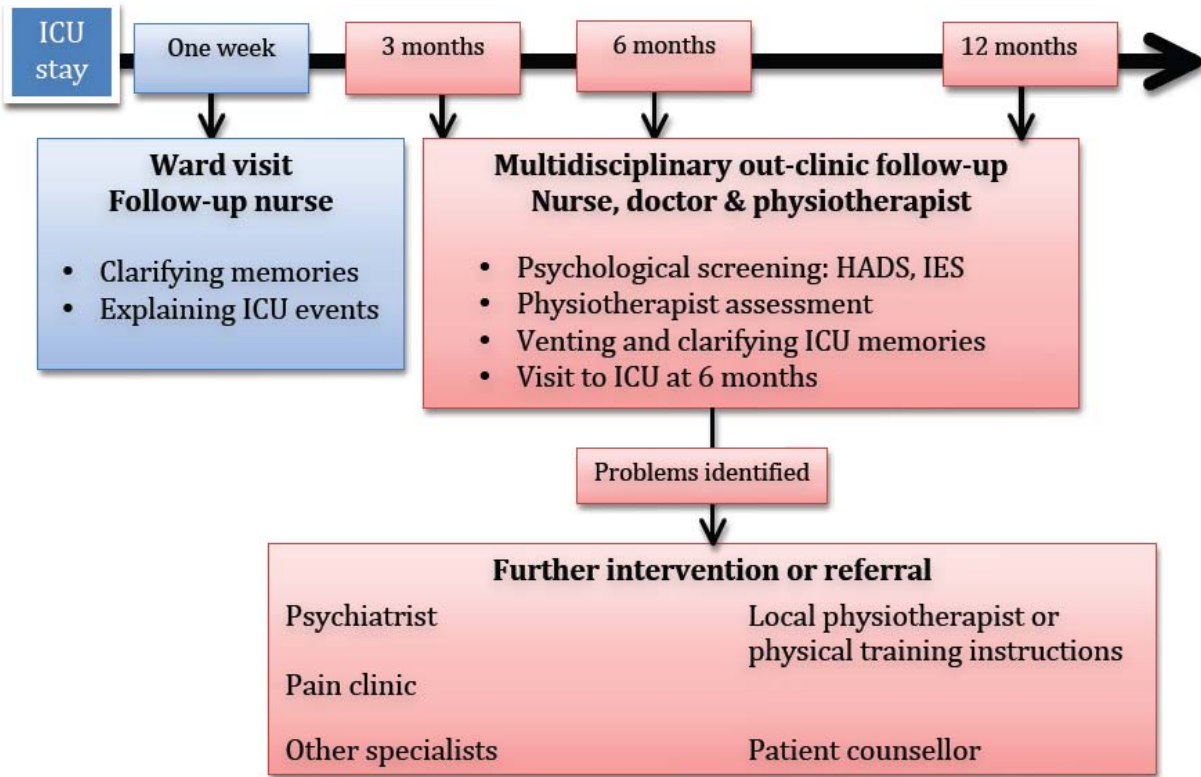

Supplement: MOESM3 [file 9708804]
